# Supplementary material
Source: MDPI journal article supplement (https://www.mdpi.com/2072-4292/12/7/1220)
Supplement: s1 [file s1]

## Supplementary Material

**Supplementary Table 1.** Description of five land cover classes used in image classification.

| Code | Land-cover Class    | Description                                                                                                                                                                                           | Number of polygons or ROI | Example of ROI extracted from Google Earth Pro high-quality imagery                   |
|------|---------------------|-------------------------------------------------------------------------------------------------------------------------------------------------------------------------------------------------------|---------------------------|---------------------------------------------------------------------------------------|
| FOR  | Forest              | Closed canopy forest with fairly continuous tree cover, heterogeneous tree height. Located away from human settlements, at the edge of intact forest, or as large patches in agricultural landscapes. | 140                       | 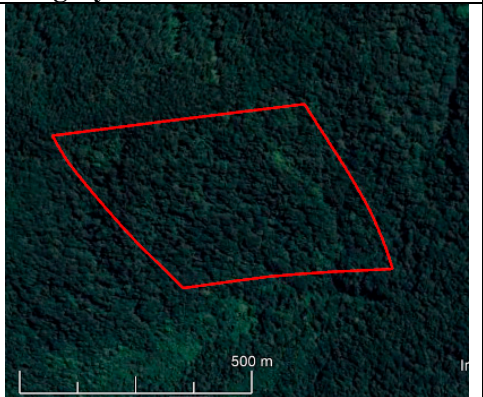   |
| FSM  | Forest-Shrub-Mosaic | Degraded woody vegetation with low and sparse tree cover. Includes degraded forests and forest fragments located close to human settlements.                                                          | 155                       |   |
| OPM  | Oil Palm            | Closed and fairly closed canopy oil palm trees interspersed along straight lines and having regular patterns. Some bare ground or grass can be visible between oil palm rows.                         | 125                       |  |
| BGC  | Bare ground - Crop  | Croplands without trees, exposed soil or ground with low vegetation cover.                                                                                                                            | 137                       |  |

|     |               |                                                                                  |     |                                                                                     |
|-----|---------------|----------------------------------------------------------------------------------|-----|-------------------------------------------------------------------------------------|
| URB | Built-up area | Include developed land like building, roads and human settlements                | 114 |  |
| WTR | Water         | Freshwater rivers and lakes, saltwater bodies such as oceans, and flooded areas. | 117 |  |

**Supplementary Table 2.** Number of training and testing pixels for each image stack.

| <b>Image stack</b> | <b>Training pixels</b> | <b>Testing pixels</b> |
|--------------------|------------------------|-----------------------|
| SAR                | 191,663                | 108,816               |
| Landsat            | 133,064                | 75,502                |
| Combined           | 133,039                | 75,501                |

**Supplementary Table 3.** Error matrices for Landsat classified image. PA = Producer's Accuracy, UA = User's Accuracy, OA = Overall Accuracy.

| <b>Landsat</b>      | Forest      | Bare ground-crop | Forest-Shrub | Oil palm    | Built-up area | Water       | <b>UA</b>       |
|---------------------|-------------|------------------|--------------|-------------|---------------|-------------|-----------------|
| Forest              | 18974       | 619              | 674          | 647         | 0             | 0           | <b>0.91</b>     |
| Bare ground-Crop    | 385         | 13200            | 1533         | 855         | 403           | 58          | <b>0.80</b>     |
| Forest-Shrub-Mosaic | 4527        | 735              | 3906         | 1474        | 17            | 0           | <b>0.37</b>     |
| Oil palm            | 2479        | 218              | 1408         | 6851        | 8             | 0           | <b>0.62</b>     |
| Built-up area       | 0           | 328              | 0            | 0           | 5934          | 103         | <b>0.93</b>     |
| Water               | 26          | 278              | 0            | 0           | 2             | 9860        | <b>0.97</b>     |
| <b>PA</b>           | <b>0.72</b> | <b>0.86</b>      | <b>0.52</b>  | <b>0.70</b> | <b>0.93</b>   | <b>0.98</b> | <b>OA= 0.78</b> |

**Supplementary Table 4.** Error matrices for SAR classified image. PA = Producer's Accuracy, UA = User's Accuracy, OA = Overall Accuracy.

| <b>SAR</b>          | Forest      | Bare ground-crop | Forest-Shrub | Oil palm    | Built-up area | Water       | <b>UA</b>      |
|---------------------|-------------|------------------|--------------|-------------|---------------|-------------|----------------|
| Forest              | 31085       | 93               | 4824         | 75          | 1542          | 53          | <b>0.83</b>    |
| Bare ground-Crop    | 23          | 16255            | 1424         | 2047        | 476           | 295         | <b>0.79</b>    |
| Forest-Shrub-Mosaic | 5322        | 2509             | 2951         | 410         | 915           | 143         | <b>0.24</b>    |
| Oil palm            | 1018        | 2669             | 1463         | 11500       | 794           | 62          | <b>0.66</b>    |
| Built-up area       | 318         | 203              | 69           | 226         | 5503          | 257         | <b>0.84</b>    |
| Water               | 114         | 410              | 51           | 15          | 83            | 13619       | <b>0.95</b>    |
| <b>PA</b>           | <b>0.82</b> | <b>0.73</b>      | <b>0.27</b>  | <b>0.81</b> | <b>0.59</b>   | <b>0.94</b> | <b>OA=0.74</b> |

**Supplementary Table 5.** Error matrices for Combined classified image. PA = Producer's Accuracy, UA = User's Accuracy, OA = Overall Accuracy.

| <b>Combined</b>     | Forest      | Bare ground-crop | Forest-Shrub | Oil palm    | Built-up area | Water       | <b>UA</b>      |
|---------------------|-------------|------------------|--------------|-------------|---------------|-------------|----------------|
| Forest              | 19997       | 384              | 852          | 10          | 1             | 0           | <b>0.94</b>    |
| Bare ground-Crop    | 104         | 13990            | 1364         | 1126        | 156           | 84          | <b>0.83</b>    |
| Forest-Shrub-Mosaic | 6107        | 527              | 4849         | 415         | 43            | 0           | <b>0.41</b>    |
| Oil palm            | 182         | 305              | 456          | 8276        | 9             | 0           | <b>0.90</b>    |
| Built-up area       | 0           | 116              | 0            | 0           | 6152          | 82          | <b>0.97</b>    |
| Water               | 1           | 56               | 0            | 0           | 3             | 9854        | <b>0.99</b>    |
| <b>PA</b>           | <b>0.76</b> | <b>0.91</b>      | <b>0.64</b>  | <b>0.84</b> | <b>0.97</b>   | <b>0.98</b> | <b>OA=0.84</b> |

**Supplementary Table 6.** Identification reference of the 40 Landsat images used in the classification

|                                          |
|------------------------------------------|
| LC08_L1TP_127059_20150106_20170415_01_T1 |
| LC08_L1TP_127060_20150106_20170415_01_T1 |
| LC08_L1TP_127060_20150122_20170413_01_T1 |
| LC08_L1TP_127059_20150207_20170413_01_T1 |
| LC08_L1TP_127059_20150223_20170412_01_T1 |
| LC08_L1TP_127060_20150223_20170412_01_T1 |
| LC08_L1TP_127059_20150311_20170412_01_T1 |
| LC08_L1TP_127060_20150311_20170412_01_T1 |
| LC08_L1TP_127059_20150327_20170411_01_T1 |
| LC08_L1TP_127060_20150327_20170411_01_T1 |
| LC08_L1TP_127059_20150412_20170410_01_T1 |
| LC08_L1TP_127060_20150412_20170410_01_T1 |
| LC08_L1TP_127059_20150428_20170409_01_T1 |
| LC08_L1TP_127060_20150428_20170409_01_T1 |
| LC08_L1TP_127059_20150514_20170409_01_T1 |
| LC08_L1TP_127059_20150530_20170408_01_T1 |
| LC08_L1TP_127060_20150530_20170408_01_T1 |
| LC08_L1TP_127059_20150615_20170407_01_T1 |
| LC08_L1TP_127060_20150615_20170407_01_T1 |
| LC08_L1TP_127059_20150701_20170407_01_T1 |
| LC08_L1TP_127060_20150701_20170407_01_T1 |
| LC08_L1TP_127059_20150717_20170407_01_T1 |
| LC08_L1TP_127060_20150717_20170407_01_T1 |
| LC08_L1TP_127059_20150802_20170406_01_T1 |
| LC08_L1TP_127060_20150802_20170406_01_T1 |
| LC08_L1TP_127059_20150818_20170406_01_T1 |
| LC08_L1TP_127060_20150818_20170406_01_T1 |
| LC08_L1TP_127059_20150903_20170404_01_T1 |
| LC08_L1TP_127060_20150903_20170404_01_T1 |

|                                          |
|------------------------------------------|
| LC08_L1TP_127060_20150919_20170404_01_T1 |
| LC08_L1TP_127059_20151005_20170403_01_T1 |
| LC08_L1TP_127060_20151005_20170403_01_T1 |
| LC08_L1TP_127059_20151021_20170403_01_T1 |
| LC08_L1TP_127060_20151021_20170403_01_T1 |
| LC08_L1TP_127060_20151106_20170402_01_T1 |
| LC08_L1TP_127059_20151122_20170401_01_T1 |
| LC08_L1TP_127060_20151122_20170401_01_T1 |
| LC08_L1TP_127060_20151208_20170401_01_T1 |
| LC08_L1TP_127059_20151224_20170331_01_T1 |
| LC08_L1TP_127060_20151224_20170331_01_T1 |



**Supplementary Table 7.** Producer’s (%) and User’s (%) accuracy of Combined, Landsat and SAR land-cover maps classified with a Classification and Regression Tree (CART) algorithm. ‘PA’ refers to Producer’s accuracy and ‘UA’ refers to User’s accuracy. Values in bold represents the highest producer’s and user’s accuracy for oil palm land-cover and highest overall accuracy.

| Land-cover class    |    | Combined   | Landsat | SAR |
|---------------------|----|------------|---------|-----|
| Oil Palm            | PA | <b>87%</b> | 53%     | 64% |
|                     | UA | <b>89%</b> | 66%     | 76% |
| Forest              | PA | 61%        | 56%     | 58% |
|                     | UA | 73%        | 60%     | 64% |
| Forest Shrub Mosaic | PA | 46%        | 37%     | 26% |
|                     | UA | 39%        | 30%     | 25% |
| Bare Ground Crop    | PA | 75%        | 66%     | 53% |
|                     | UA | 65%        | 55%     | 39% |
| Built-up Area       | PA | 97%        | 94%     | 67% |
|                     | UA | 94%        | 88%     | 58% |
| Water               | PA | 98%        | 98%     | 94% |
|                     | UA | 99%        | 99%     | 95% |
| Overall Accuracy    |    | <b>77%</b> | 66%     | 62% |
